# Supplementary material for: Dynamin-2 reduction rescues the skeletal myopathy of a SPEG-deficient mouse model
Source: PubMed Central journal article supplement (PMC9462472; doi:10.1172/jci.insight.157336), 2022-08-08
Supplement: jciinsight-7-157336-s018.pdf [file jciinsight-7-157336-s018.pdf]

1 **Dynamin-2 reduction reduces the skeletal myopathy of SEPG-deficient mouse**  
2 **model**

3 Qifei Li<sup>1,2,3</sup>, Jasmine Lin<sup>1,2,3</sup>, Jeffrey J. Widrick<sup>2,3</sup>, Shiyu Luo<sup>1,2,3</sup>, Gu Li<sup>4,5</sup>, Yuanfan  
4 Zhang<sup>2</sup>, Jocelyn Laporte<sup>6</sup>, Mark A. Perrella<sup>4,5</sup>, Xiaoli Liu<sup>4,5</sup>, Pankaj B. Agrawal<sup>1,2,3,\*</sup>

5

6 <sup>1</sup>Division of Newborn Medicine, <sup>2</sup>Division of Genetics and Genomics, <sup>3</sup>The Manton  
7 Center for Orphan Disease Research, Boston Children's Hospital, Harvard Medical  
8 School; Boston, Massachusetts 02115, USA.

9 <sup>4</sup>Division of Pulmonary and Critical Care Medicine, <sup>5</sup>Department of Pediatric Newborn  
10 Medicine, Brigham and Women's Hospital, Harvard Medical School; Boston,  
11 Massachusetts 02115, USA.

12 <sup>6</sup>IGBMC (Institut de Génétique et de Biologie Moléculaire et Cellulaire), INSERM  
13 U1258, CNRS UMR7104, Strasbourg University, 67404 Illkirch, France.

14

15 \*To whom correspondence should be addressed at: Pankaj B. Agrawal, MD, Boston  
16 Children's Hospital and Harvard Medical School, 300 Longwood Ave., Enders 9, Boston,  
17 MA 02115, USA. Tel: +1 6179192153; Fax: +1 6177300486; Email:  
18 pagrawal@enders.tch.harvard.edu

19

20

21

22 **Supplementary Materials**

23 **Methods**

24 *Immunoblot Analysis.* Skeletal muscles from control, *Speg*-KO and *Speg*-rescue  
25 littermate mice were dissected, snap frozen in isopentane, and stored at  $-80^{\circ}\text{C}$  until  
26 analysis. Protein isolation and western blot procedures were performed as described  
27 previously(1). Immunofluorescent western blot was performed in addition to  
28 chemiluminescent western blot. Proteins were probed with antibody against rabbit anti-  
29 SPEG (12472-T16, 1:1000 dilution, SinoBiological, Beijing, China), mouse anti-DNM2  
30 (sc-166526, 1:100 dilution, Santa Cruz Biotechnology), and mouse anti-glyceraldehyde-  
31 3-phosphate dehydrogenase (GAPDH; MA5-15738, 1:1000 dilution, ThermoFisher  
32 Scientific). Secondary horseradish peroxidase-conjugated antibodies against rabbit  
33 (7074S, 1:2000 dilution, Cell Signaling Technology) and against mouse (7076S, 1:2000  
34 dilution, Cell Signaling Technology, Danvers, MA, USA) were detected using enhanced  
35 chemiluminescence. IRDye 800CW Donkey anti-Rabbit IgG Secondary antibody (926-  
36 32213, 1:5000, LI-COR), IRDye 680RD Donkey anti-Mouse IgG Secondary antibody  
37 (926-68072, 1:5000, LI-COR), and anti-GAPDH Rhodamine antibody (12004168,  
38 1:5000, Bio-Rad Laboratories) were used for immunofluorescence detection.  
39 Quantification of protein levels normalized to GAPDH was performed using ImageJ  
40 software.

41

42 *Echocardiography.* Transthoracic echocardiography was performed on mice under  
43 isoflurane anesthesia, using a Vevo 2100 high-resolution micro ultrasound system and a  
44 50 MHz probe. The hearts were imaged in the B-model for the two-dimensional

45 parasternal short-axis view at the level of papillary muscles (2, 3), and the M-mode for  
46 the end-systolic and end-diastolic internal dimensions of the LV (LVID, s; LVID, d,  
47 respectively). The LV fraction shortening (LVFS) and ejection fraction (LVEF) were  
48 calculated by the following formula,  $SF = (LVID, d - LVID, s) / LVID, d \times 100$ ,  $EF\% = (LV$   
49  $vol, d - LV vol, s) / LV vol, d \times 100$ . The echocardiograms were performed in a blinded  
50 manner, without knowing the genotype in advance.

51 **Supplementary figures**

52 **Supplementary Figure 1. SPEG $\beta$  interacts DNMT2 in skeletal muscle.** SPEG $\beta$  and  
53 DNMT2 coimmunoprecipitated from soleus and triceps lysates with the use of rabbit anti-  
54 SPEG generated against a FLAG-tagged APEG-1 fusion protein and anti-DNMT2  
55 antibodies.

56 **Supplementary Figure 2. Breeding strategy of *Speg*-KO mice with DNMT2**  
57 **haploinsufficiency (*Speg*-rescue).** *Speg*-KO mice (*Speg*<sup>fl/fl</sup>/*MCK-Cre*<sup>+</sup>/*Dnm2*<sup>+/+</sup>) are cre-  
58 positive, homozygous for floxed *Speg* allele and DNMT2 WT; *Speg*-rescue mice  
59 (*Speg*<sup>fl/fl</sup>/*MCK-Cre*<sup>+</sup>/*Dnm2*<sup>+/-</sup>) are MCK-cre-positive, homozygous for floxed *Speg* allele  
60 and heterozygous for DNMT2 allele; Control mice (*Speg*<sup>fl/+</sup>/*MCK-Cre*<sup>+</sup>/*Dnm2*<sup>+/+</sup>,  
61 *Speg*<sup>fl/fl</sup>/*MCK-Cre*<sup>-</sup>/*Dnm2*<sup>+/+</sup> or *Speg*<sup>fl/+</sup>/*MCK-Cre*<sup>-</sup>/*Dnm2*<sup>+/+</sup>) are DNMT2 WT.

62 **Supplementary Figure 3. DNMT2 protein expression in striated muscles.** Immunoblot  
63 images of SPEG and DNMT2 expression in various types of striated muscles, including  
64 gastrocnemius, triceps, diaphragm, and heart.

65 **Supplementary Figure 4. DNMT2 reduction increases body weight of *Speg*-KO mice.**  
66 (A) Comparison of body weight at 11 weeks for male mice (control, n = 14; *Speg*-KO, n  
67 = 4; *Speg*-rescue, n = 11). (B) Comparison of body weight at 15 weeks for female mice  
68 (control, n = 9; *Speg*-KO, n = 4; *Speg*-rescue, n = 5). \*, *P* < 0.05; \*\*\*, *P* < 0.001; one-  
69 way ANOVA with Tukey's post hoc test.

70 **Supplementary Figure 5. DNMT2 reduction fails to rescue cardiac phenotype in *Speg*-**  
71 **KO mice.** (A) Representative mouse echocardiograms at 3 months of age. The left  
72 ventricles of hearts were assessed for (B) ejection fraction (LVEF, %) and (C) fractional

73 shortening (LVFS, %) at 3 months of age (n = 3 per genotype; one-way ANOVA with  
74 Tukey's post hoc test). (D) Representative macroscopic images of hearts from each group  
75 of mice.

76 **Supplementary Figure 6. *Speg*-rescue mice develop an enlarged heart with impaired**  
77 **cardiac function over time.** The left ventricles of hearts were evaluated for ejection  
78 fraction (LVEF, %) and fractional shortening (LVFS, %) at 9 months of age (n = 1 per  
79 genotype).

80 **Supplementary Figure 7. DNM2 haploinsufficient mice are absent of cardiac**  
81 **phenotype.** (A) Representative mouse echocardiograms of DNM2 haploinsufficient and  
82 litter-matched control mice at 5 months of age. The left ventricles of hearts were assessed  
83 for (B) ejection fraction (LVEF, %) and (C) fractional shortening (LVFS, %). (D) Images  
84 of hearts from DNM2 haploinsufficient and litter-matched control mice; n = 2 per  
85 genotype.

86

87 **Supplementary Table 1. Breeding strategy and outcome for *Speg*-rescue mice**  
88 **(*Speg*<sup>fl/fl</sup>/*MCK-Cre*<sup>+</sup>/*Dnm2*<sup>+/-</sup>) with expected mice and obtained at 21 days after birth.**

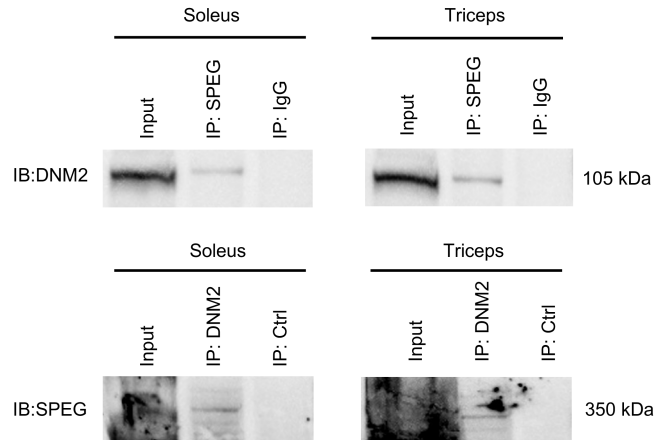

**Supplementary Figure 1. SPEG $\beta$  interacts DNM2 in skeletal muscle.** SPEG $\beta$  and DNM2 coimmunoprecipitated from soleus and triceps lysates with the use of rabbit anti-SPEG generated against a FLAG-tagged APEG-1 fusion protein and anti-DNM2 antibodies.

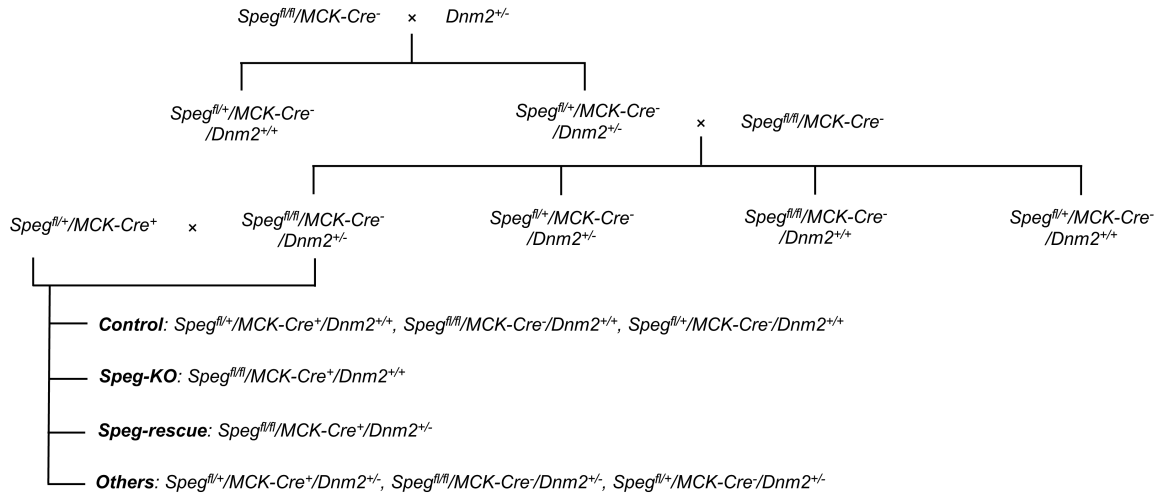

### Supplementary Figure 2. Breeding strategy of *Spieg*-KO mice with DN2

**haploinsufficiency (*Spieg-rescue*).** *Spieg*-KO mice ( $Spieg^{fl/fl}/MCK-Cre^{+}/Dnm2^{+/+}$ ) are cre-positive, homozygous for floxed *Spieg* allele and DN2 WT; *Spieg-rescue* mice ( $Spieg^{fl/fl}/MCK-Cre^{+}/Dnm2^{+/-}$ ) are MCK-cre-positive, homozygous for floxed *Spieg* allele and heterozygous for DN2 allele; Control mice ( $Spieg^{fl+/}/MCK-Cre^{+}/Dnm2^{+/+}$ ,  $Spieg^{fl/fl}/MCK-Cre^{-}/Dnm2^{+/+}$  or  $Spieg^{fl+/}/MCK-Cre^{-}/Dnm2^{+/+}$ ) are DN2 WT.

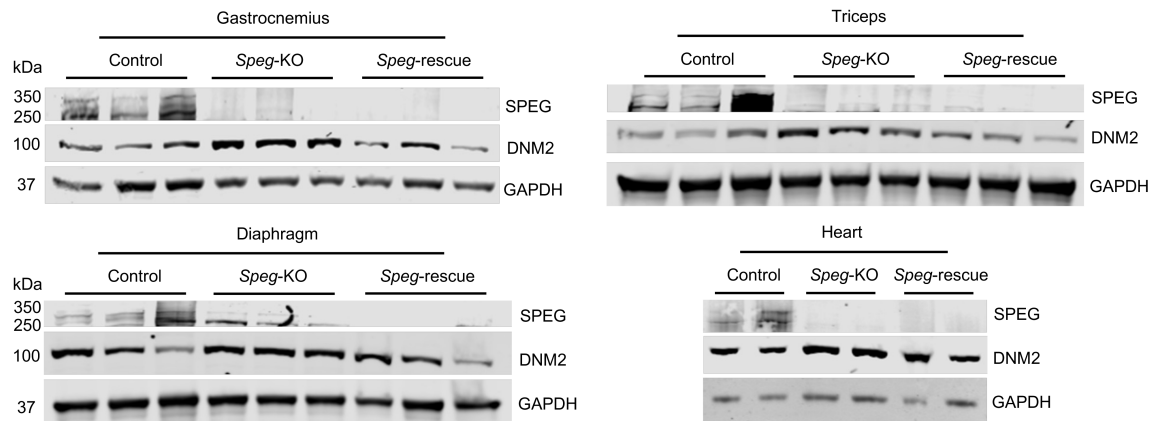

**Supplementary Figure 3. DNM2 protein expression in striated muscles.** Immunoblot images of SPEG and DNM2 expression in various types of striated muscles, including gastrocnemius, triceps, diaphragm, and heart.



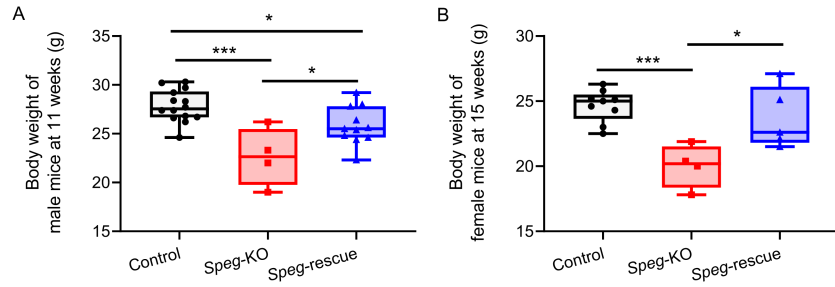

**Supplementary Figure 4. DNMT2 reduction increases body weight of *Speg*-KO mice.**

(A) Comparison of body weight at 11 weeks for male mice (control, n = 14; *Speg*-KO, n = 4; *Speg*-rescue, n = 11). (B) Comparison of body weight at 15 weeks for female mice (control, n = 9; *Speg*-KO, n = 4; *Speg*-rescue, n = 5). \*,  $P < 0.05$ ; \*\*\*,  $P < 0.001$ ; one-way ANOVA with Tukey's post hoc test.

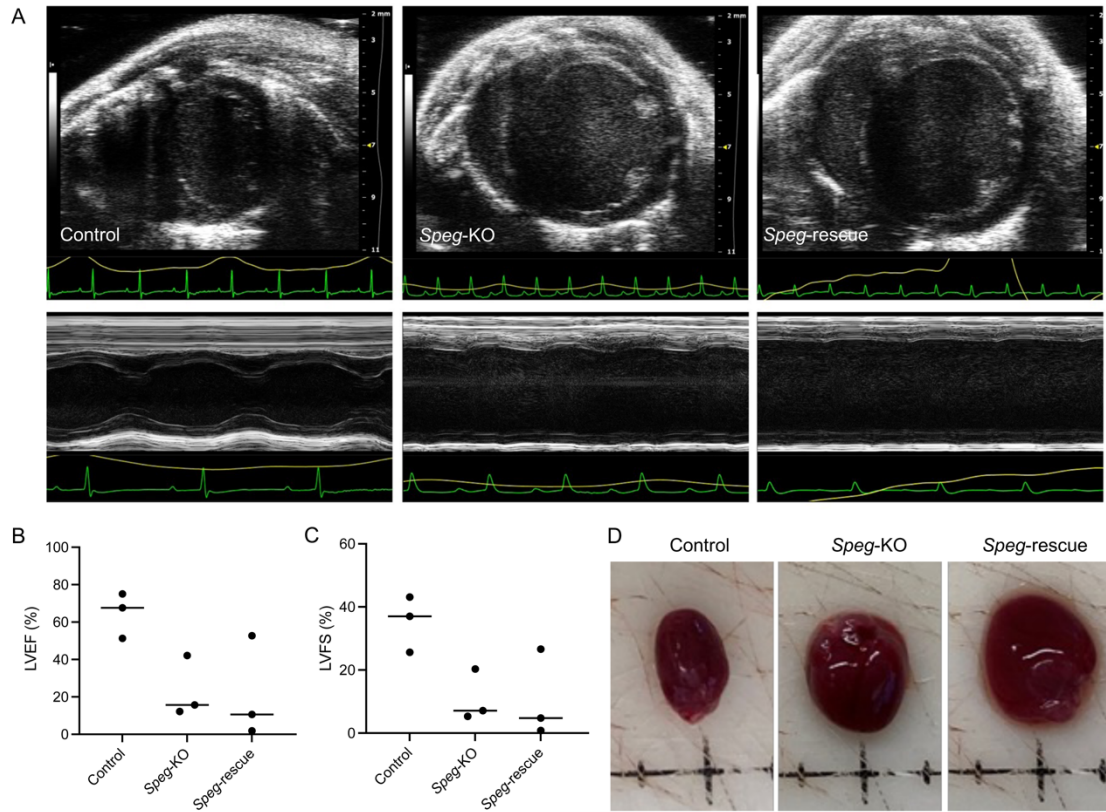

**Supplementary Figure 5. DNM2 reduction fails to rescue cardiac phenotype in *Speg-KO* mice.** (A) Representative mouse echocardiograms at 3 months of age. The left ventricles of hearts were assessed for (B) ejection fraction (LVEF, %) and (C) fractional shortening (LVFS, %) at 3 months of age (n = 3 per genotype; one-way ANOVA with Tukey's post hoc test). (D) Representative macroscopic images of hearts from each group of mice.

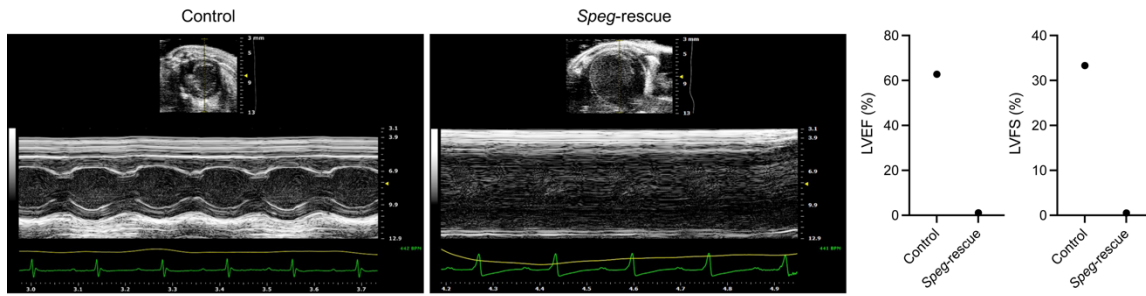

**Supplementary Figure 6. *Speg-rescue* mice develop an enlarged heart with impaired cardiac function over time.** The left ventricles of hearts were evaluated for ejection fraction (LVEF, %) and fractional shortening (LVFS, %) at 9 months of age (n = 1 per genotype).

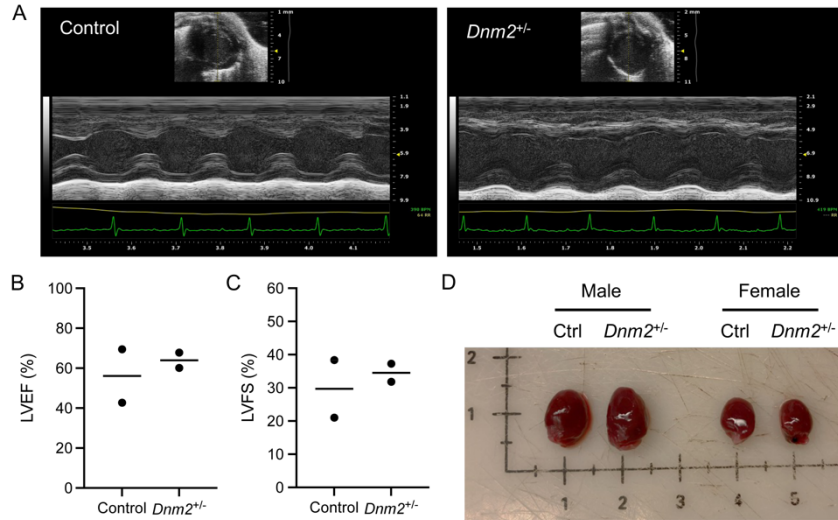

**Supplementary Figure 7. DNM2 haploinsufficient mice are absent of cardiac phenotype.** (A) Representative mouse echocardiograms of DNM2 haploinsufficient and litter-matched control mice at 5 months of age. The left ventricles of hearts were assessed for (B) ejection fraction (LVEF, %) and (C) fractional shortening (LVFS, %); n = 2 per genotype. (D) Images of hearts from DNM2 haploinsufficient and litter-matched control mice.

**Supplementary Table 1. Breeding strategy and outcome for *Speg*-rescue mice (*Speg*<sup>fl/fl</sup>/*MCK-Cre*<sup>+</sup>/*Dnm2*<sup>+/-</sup>) with expected mice and obtained at 21 days after birth.**

| <i>Speg</i> <sup>fl/fl</sup> / <i>Dnm2</i> <sup>+/-</sup> x <i>Speg</i> <sup>fl/+</sup> / <i>MCK-Cre</i> <sup>+</sup> |                                                                                                                   |                                                                                                               |                                                                                                                                                                                                                                                                                              |        |
|-----------------------------------------------------------------------------------------------------------------------|-------------------------------------------------------------------------------------------------------------------|---------------------------------------------------------------------------------------------------------------|----------------------------------------------------------------------------------------------------------------------------------------------------------------------------------------------------------------------------------------------------------------------------------------------|--------|
| Offspring<br>(n =315)                                                                                                 | <i>Speg</i> <sup>fl/fl</sup> / <i>MCK-Cre</i> <sup>+</sup> / <i>Dnm2</i> <sup>+/-</sup><br>( <i>Speg</i> -rescue) | <i>Speg</i> <sup>fl/fl</sup> / <i>MCK-Cre</i> <sup>+</sup> / <i>Dnm2</i> <sup>+/+</sup><br>( <i>Speg</i> -KO) | <i>Speg</i> <sup>fl/fl</sup> / <i>MCK-Cre</i> <sup>-</sup> / <i>Dnm2</i> <sup>+/+</sup> ,<br><i>Speg</i> <sup>fl/+</sup> / <i>MCK-Cre</i> <sup>-</sup> / <i>Dnm2</i> <sup>+/+</sup> ,<br><i>Speg</i> <sup>fl/+</sup> / <i>MCK-Cre</i> <sup>+</sup> / <i>Dnm2</i> <sup>+/+</sup><br>(Control) | Others |
| Obtained genotypes                                                                                                    | 41                                                                                                                | 38                                                                                                            | 142                                                                                                                                                                                                                                                                                          | 94     |
| Expected genotypes                                                                                                    | 39.375                                                                                                            | 39.375                                                                                                        | 118.12                                                                                                                                                                                                                                                                                       | 118.12 |

Others: *Speg*<sup>fl/fl</sup>/*MCK-Cre*<sup>-</sup>/*Dnm2*<sup>+/-</sup>, *Speg*<sup>fl/+</sup>/*MCK-Cre*<sup>-</sup>/*Dnm2*<sup>+/-</sup>, *Speg*<sup>fl/+</sup>/*MCK-Cre*<sup>+</sup>/*Dnm2*<sup>+/-</sup>.

## References

1. Agrawal PB, Joshi M, Savic T, Chen Z, and Beggs AH. Normal myofibrillar development followed by progressive sarcomeric disruption with actin accumulations in a mouse Cfl2 knockout demonstrates requirement of cofilin-2 for muscle maintenance. *Hum Mol Genet.* 2012;21(10):2341-56.
2. Liu X, Ramjiganesh T, Chen Y-H, Chung SW, Hall SR, Schissel SL, et al. Disruption of striated preferentially expressed gene locus leads to dilated cardiomyopathy in mice. *Circulation.* 2009;119(2):261-8.
3. Liao R, Jain M, Cui L, D'Agostino J, Aiello F, Luptak I, et al. Cardiac-specific overexpression of GLUT1 prevents the development of heart failure attributable to pressure overload in mice. *Circulation.* 2002;106(16):2125-31.
